# Supplementary material
Source: PubMed Central journal article supplement (PMC4201036)
Supplement: NIHMS632723-supplement-Supplementary_Material.pdf [file NIHMS632723-supplement-Supplementary_Material.pdf]

# Supporting Information

for

“A hydration study of (1→4) and (1→6) linked  
 $\alpha$ -glucans by comparative 10 ns molecular dynamics  
simulations and 500 MHz NMR”

submitted to *The Journal of Computational Chemistry* by:

Francisco Corzana, Mohammed S. Motawia, Catherine Hervé du Penhoat,  
Serge Perez, Sarah M. Tschampel, Robert J. Woods and Søren B. Engelsen\*

Table S1. Van der Waals radii in Ångström of the different atoms for the non-bonding interaction

|                     | <b>Glycam2000a<sup>a</sup></b>        | <b>HGFB</b> | <b>CSFF</b> |
|---------------------|---------------------------------------|-------------|-------------|
| <b>C</b>            | 1.908                                 | 1.800       | 2.275       |
| <b>O</b>            | 1.831                                 | 1.600       | 1.770       |
| <b>H</b>            | 1.387 (H1) <sup>b</sup><br>1.287 (H2) | 1.468       | 1.320       |
| <b>O (hydroxyl)</b> | 1.961                                 | 1.600       | 1.770       |
| <b>H (hydroxyl)</b> | 0.000                                 | 0.800       | 0.2245      |

<sup>a</sup> Distances are given in Å.

<sup>b</sup> H2= anomeric hydrogen, H1= sugar aliphatic hydrogen

Table S2. Partial charges of the methanol atoms used in this work in the three force fields (Gycam\_2000a, HGFB and CSFF)

| <b>Partial Charges<sup>a</sup></b> |        |
|------------------------------------|--------|
| <b>C</b>                           | 0.272  |
| <b>O</b>                           | -0.699 |
| <b>HO</b>                          | 0.409  |
| <b>H</b>                           | 0.006  |

<sup>a</sup> Calculated using HF/6-31g\* Resp0.000
